# Supplementary material for: Validation of a Questionnaire to Assess the Perception of Women with Atopic Dermatitis in Family Planning
Source: MDPI journal article supplement (doi:10.3390/ijerph191710753), 2022-08-29
Supplement: s1 [file s1]

**Table S1.** Regression analysis of global score and variables in the AD group

| Variable                       | $\beta$ | p            | R <sup>2</sup> |
|--------------------------------|---------|--------------|----------------|
| Age >30 years                  | -,069   | 0.555        | 0.436          |
| University studies             | -0.022  | 0.848        |                |
| Years duration DA >13 years    | 0.045   | 0.673        |                |
| EASI > 7                       | 0.001   | 0.992        |                |
| DLQI >3                        | -0.088  | 0.394        |                |
| Has Children                   | ,574    | <b>0.000</b> |                |
| Sistemic or biologic treatment | ,234    | <b>0.027</b> |                |

$\beta$ : standardized regression coefcient; p: p-value
